# Supplementary material
Source: Springer Nature journal article supplement (https://www.springermedizin.de/resource/supplementary/12885_2012_3213_MOESM1_ESM.pdf/9463198)
Supplement: MOESM1 [file 9463198]

| Additional file 1. Distribution of CD163+ and CD68+ macrophages in primary breast cancer |              |      |           |      |                            |      |
|------------------------------------------------------------------------------------------|--------------|------|-----------|------|----------------------------|------|
|                                                                                          | Whole cohort |      | Luminal A |      | Triple-negative/basal-like |      |
|                                                                                          | CD163        | CD68 | CD163     | CD68 | CD163                      | CD68 |
| Dense infiltration in tumor stroma (%)                                                   | 17           | 9    | 8         | 6    | 80                         | 23   |
| Dense infiltration in tumor nest (%)                                                     | 9            | 6    | 10        | 9    | 8                          | 0    |
